1 **Metabarcoding of unfractionated water samples relates phyto-, zoo-**  
2 **and bacterioplankton dynamics and reveals a single-taxon bacterial**  
3 **bloom**

4

5 Christian Wurzbacher<sup>1, 2, 3, 4</sup>, Katrin Attermeyer<sup>3, 5</sup>, Marie Therese Kettner<sup>3, 6</sup>, Clara  
6 Flintrop<sup>4, 7</sup>, Norman Warthmann<sup>2, 4, 8</sup>, Sabine Hilt<sup>2</sup>, Hans-Peter Grossart<sup>3, 6</sup>,  
7 Michael T. Monaghan<sup>2, 4</sup>

8

9 1 University of Gothenburg, Department of Biological and Environmental Sciences, Box 461,  
10 40530 Göteborg, Sweden

11 2 Leibniz-Institute of Freshwater Ecology and Inland Fisheries, Müggelseedamm 301, 12587  
12 Berlin, Germany

13 3 Leibniz-Institute of Freshwater Ecology and Inland Fisheries, Alte Fischerhütte 2, 16775  
14 Stechlin, Germany

15 4 Berlin Center for Genomics in Biodiversity Research, Königin-Luise-Str. 6-8, 14195 Berlin,  
16 Germany

17 5 Uppsala University, Department of Ecology and Genetics, Limnology, Norbyvägen 18D, 75236  
18 Uppsala, Sweden

19 6 Potsdam University, Institute of Biochemistry and Biology, Maulbeerallee 2, 14469 Potsdam,  
20 Germany

21 7 Helmholtz Young Investigator Group SEAPUMP, Alfred Wegener Institute for Polar and Marine  
22 Research, Am Handelshafen 12, 27570 Bremerhaven, and MARUM, University of Bremen,  
23 Leobener Strasse, 28359 Bremen, Germany

24 8 The Australian National University, Research School of Biology, Linnaeus Way, Canberra, ACT  
25 2601, Australia

26

27

28 Corresponding authors: Christian Wurzbacher ([christian@wurzbacher.cc](mailto:christian@wurzbacher.cc)), Katrin  
29 Attermeyer ([katrin.attermeyer@ebc.uu.se](mailto:katrin.attermeyer@ebc.uu.se))

30

31

## 32 **Summary**

33 Most studies of aquatic plankton focus on either macroscopic or microbial  
34 communities, and on either eukaryotes or prokaryotes. This separation is  
35 primarily for methodological reasons, but can overlook potential interactions  
36 among groups. We tested whether DNA-metabarcoding of unfractionated water  
37 samples with universal primers could be used to qualitatively and  
38 quantitatively study the temporal dynamics of the total plankton community in  
39 a shallow temperate lake. We found significant changes in the relative  
40 proportions of normalized sequence reads of eukaryotic and prokaryotic  
41 plankton communities over a three-month period in spring. Patterns followed  
42 the same trend as plankton estimates using traditional microscopic methods.  
43 We characterized the bloom of a conditionally rare bacterial taxon belonging to  
44 *Arcicella*, which rapidly came to dominate the whole lake ecosystem and would  
45 have remained unnoticed without metabarcoding. Our data demonstrate the  
46 potential of universal DNA-metabarcoding applied to unfractionated samples  
47 for providing a more holistic view of plankton communities.

48

## 49 **Introduction**

50 Microbial communities are an integral component of total biodiversity  
51 (Barberán *et al.*, 2014) and play key roles in all ecosystems. Understanding of  
52 their composition and dynamics is a critical component of studying ecosystem  
53 functions and services. Plankton communities in freshwater and marine  
54 ecosystems are comprised of both microbial and macroscopic organisms from  
55 all three domains of life (archaea, prokaryotes, and eukaryotes). Traditionally,  
56 plankton is classified into functional groups such as phytoplankton,  
57 zooplankton, and bacterioplankton; or into size classes such as picoplankton,

58 nanoplankton, and microplankton. This classification has resulted in the  
59 emergence of independent fields of inquiry, particularly the separation of  
60 prokaryotic and eukaryotic groups.

61

62 A consequence of this separation is that studies rarely survey all members of  
63 the plankton community simultaneously, except for a few contemporary marine  
64 surveys (Steele *et al.*, 2011, Lima-Mendez *et al.*, 2015). This is despite the  
65 potential that integrated studies have for providing an interdisciplinary view of  
66 plankton communities (Fuhrman *et al.*, 2015) by shedding light on the strength  
67 of biotic interactions (Needham and Fuhrman 2016). Most plankton studies  
68 employ size-selection steps (i.e. size fractionation by selective filtration) and  
69 genetic markers targeting either bacteria, archaea, or eukaryotes. Our  
70 literature review found that less than 0.5% of studies targeted all three (SI1).  
71 This tradition impairs a full integration of microbial communities into ecological  
72 concepts.

73

74 We used a universal 16S/18S primer pair to perform DNA-metabarcoding of  
75 unfractionated water samples in a study of the entire plankton community of a  
76 eutrophic, shallow, temperate lake (*Kleiner Gollinsee*) in northeastern Germany.  
77 We extracted total DNA from direct-filtered (0.2  $\mu\text{m}$ ) lake water (0.5 to 1 L),  
78 enabling us to screen all organisms from what is traditionally size-classified as  
79 pico- to approximately mesoplankton (per definition 0.2  $\mu\text{m}$  - 20 mm). Our aim  
80 was to characterize the whole plankton community and its temporal dynamics  
81 in relation to algal biomass over a three-month period in spring (April - June)  
82 2010. This is the period with the largest changes in plankton abundance and a  
83 high species turnover in most temperate eutrophic lakes. Our sampling (see SI1

84 for parameters and experimental procedures) was part of a larger, more  
85 traditional whole-lake survey of bacteria, phytoplankton and zooplankton from  
86 April 2010 to December 2011 (Brothers *et al.*, 2013, Hilt *et al.*, 2010) that we  
87 used for comparison.

88

## 89 **Results & Discussion**

### 90 *Prokaryotic- and eukaryotic population dynamics*

91 The DNA-metabarcoding of unfractionated water samples successfully  
92 amplified organisms across all three domains of life, yielding a total of 1986  
93 bacterial, 544 eukaryotic, and 315 archaeal operational taxonomic units (OTUs)  
94 in the dataset. We recovered dominant organisms from nano- to mesoplankton  
95 size classes (see SI2 for taxa lists) including typical freshwater bacteria (e.g.  
96 *Polynucleobacter*, *Candidatus Aquirestis*), phytoplankton (e.g. *Cryptomonas*,  
97 *Synechococcus*), and zooplankton (e.g., *Cryptocaryon*, Diaptomidae). One field  
98 sample (June littoral zone sample) contained a small fish larva (inadvertantly  
99 sampled) and this was detected by DNA-metabarcoding as 1% of sequencing  
100 reads in that sample (classified as Cyprinidae, depicted as Teleostei in SI2).  
101 Archaeal sequences were not abundant in our Lake Gollin samples. This was  
102 not surprising because the lake was oxic during the sampling period and  
103 Archaea are rarely found in oxygenated freshwaters (Pernthaler *et al.*, 1998,  
104 Gies *et al.*, 2014). The low number of archaea was not likely caused by a primer  
105 bias, because the primer pairs have been used successfully to detect a  
106 dominance of *Archaea* in the anoxic zone of a meromictic lake (Gies *et al.*,  
107 2014). We observed a pronounced shift in relative read abundance from a  
108 dominance of eukaryotes in April to a dominance of prokaryotes in June for all  
109 sampled water compartments (i.e. littoral, pelagic and sediment zones; Fig.

110 1a). This was accompanied by an increasing heterotrophs:phototrophs ratio  
111 (SI3).

112

### 113 *Comparison with microscopical observations*

114 Abundance patterns based on DNA-metabarcoding data followed the trend of  
115 the sum parameters of phyto-, zoo- and bacterioplankton obtained from  
116 traditional microscopical counting data (e.g. ciliates in Fig. 1b, SI3). We  
117 recovered all microscopically counted planktonic organisms, although there  
118 were frequent mismatches between the classification depths in the two  
119 methods (Table S2 in SI1). Counting and sequence data were not taken on the  
120 same day and are therefore not directly comparable. Nonetheless, accounting  
121 for this difference by averaging, we found a rank-based correlation between  
122 phytoplankton reads and phytoplankton counts (Spearman's  $\rho = 0.66$ ,  $p <$   
123  $0.001$ ). For zooplankton this relationship was not significant ( $p > 0.05$ ),  
124 although subsets exhibited a strong correlation (e.g. certain groupings of  
125 ciliates). The strongest correlation between sequence and count datasets was  
126 found with log-log transformed data for both phytoplankton (Pearson's  $r = 0.45$ ,  
127  $p < 0.001$ ) and zooplankton ( $r = 0.37$ ,  $p < 0.05$ ).

128

129 Our data also captured the temporal dynamics in reported species abundances  
130 of the lake. A significant fish-kill event occurred in the winter prior to our study,  
131 caused by a prolonged ice-cover that led to anoxia (Hilt *et al.*, 2015). This had  
132 an important impact on the lake ecosystem, and a bloom of herbivorous ciliates  
133 in April 2010 (Lischke *et al.*, 2016) was clearly visible in our sequence data  
134 (approx. 30% of all reads, Fig. 1b). The ciliates would have exerted strong  
135 grazing pressure on the small plankton ( $< 5 \mu\text{m}$ ; Lischke *et al.*, 2016) but the

136 ciliate population crashed in May-June (Fig. 1b) and the role of grazer was then  
137 filled by crustaceans (Hilt *et al.*, 2015). Similarly, our sequence data from the  
138 pelagic zone indicated shifting crustacean:rotifer:ciliate read ratios, being  
139 0:6:56 in April, 9:1:26 in May, and 38:6:5 in June (SI3). The replacement of  
140 ciliates by crustaceans may have opened a niche for the observed bacterial  
141 dominance in June, via reduced grazing pressure and increased substrate  
142 supply via sloppy feeding of the copepods.

143

#### 144 *Bloom-forming OTUs*

145 The bacterial dominance occurred in June and was attributed to OTUs classified  
146 as *Arcicella* and *Variovorax* (Fig. 1c,d). June was also the period in which the  
147 highest bacterial carbon production was measured (SI3, Brothers *et al.*, 2013;  
148 Lischke *et al.*, 2016). A single *Arcicella* OTU was most abundant in the pelagic  
149 open water and its greatest proportion of reads (40%) was observed at 1 m  
150 sampling depth (Fig. 1c), suggesting it colonized the water surface. *Variovorax*  
151 was more prevalent above the sediment, suggesting colonization from the  
152 sediment (Fig. 1d). In contrast to *Variovorax*, which exhibited already stable  
153 abundances at the other two sampling dates, *Arcicella* was present at very low  
154 abundances in April and May (<0.2%) and can thus be classified as a  
155 conditionally rare taxon (Lynch and Neufeld, 2015). There are few reports of  
156 blooms of rare bacterial taxa correlated with algal blooms. Gilbert *et al.*, 2012  
157 described a *Vibrio* sp. bloom in the English channel and Bizic-Ionescu *et al.*  
158 (2014) described the genera *Flavobacterium* and *Undibacterium* associated  
159 with a phytoplankton breakdown event in a lake. In order to test whether  
160 *Arcicella* was a reoccurring taxon in Lake Gollin or if this was a unique  
161 appearance related to the fish-kill disturbance, we screened additional samples

162 (two size-fractions in this case: 0.2-5  $\mu\text{m}$  & > 5  $\mu\text{m}$ , from 19 monthly taken  
163 samples) that were available from Lake Gollin (Brothers *et al.*, 2013). *Arcicella*  
164 occurred again in the following year (Fig. 2) and its periodical appearance may  
165 be negatively related to chlorophyll-*a* concentrations and positively to  
166 crustacean biomass (Fig. 2b; see Table S3 in SI1 for correlations). This bacterial  
167 bloom therefore appears to be different from previously described blooms  
168 which were positively linked to phytoplankton abundance (e.g. Gilbert *et al.*,  
169 2012). We conclude that it was likely related to the fish-kill (see above), and  
170 our data on microbial species turnover also suggested opening of a niche  
171 allowing for bloom development of a single bacterial species. Conditionally rare  
172 taxa can thus have a disproportional effect on community structure (Shade *et*  
173 *al.*, 2014), although knowledge of their ecological and metabolic potential is  
174 required better understand their ecosystem-wide consequences.

175

### 176 *What is Arcicella?*

177 We searched the freshwater and marine literature and found few reports of  
178 *Arcicella* in environmental samples. *Arcicella* was the second-most abundant  
179 OTU (6.8%) in a study of 5 large arctic rivers (Crump *et al.*, 2009), although the  
180 taxon is not further discussed in their article. In some cases, *Arcicella* was  
181 mentioned in a figure legend or in supplementary materials and we had to  
182 request abundance data from the authors. One *Arcicella* OTU was among the  
183 most dominant OTUs in the Danube river although it comprised only 2% ( $\pm$  2%)  
184 of relative read abundance (D. Savio pers. comm.; Savio *et al.*, 2015). A single  
185 *Arcicella* OTU comprised 12 ( $\pm$  4%) of the relative read abundance in a small  
186 turbid glacial lake (Peter pers. comm.; Peter and Sommaruga, 2016). In spite of  
187 these observations, their autecology has never been investigated.

188

189 *Study limitations and perspectives*

190 There was a large standard deviation among replicates for crustaceans and  
191 rotifers (depicted as zooplankton in S3). These organisms belong to the  
192 mesoplankton size class (0.2 to 20 mm) and it may be necessary to increase  
193 the water volume of samples to better quantify them. Sequences belonging to  
194 Metazoa could only be classified to phylum-class level (e.g. Maxillopoda,  
195 Rotifera, Teleostei) using the automatic classifier. One reason for this is that the  
196 SILVA reference taxonomy that we used has not implemented freshwater  
197 zooplankton yet, but we partially resolved this problem by using the original  
198 taxonomy provided by NCBI/EMBL. A second reason is that the SSU region  
199 targeted here does not provide sufficiently variation for many Metazoan groups  
200 (Tang *et al.*, 2012). We therefore estimated the resolution of the universal  
201 marker for all of the planktonic organisms in Lake Gollin (see Table S2 in SI1).  
202 Most Rotifera OTUs could be classified only to order, while most Maxillopoda  
203 OTUs could be classified to family or genus level. Differing taxonomic resolution  
204 among groups (in particular Metazoan taxa) is one limitation of using a  
205 universal marker, and this should be considered in future studies of these  
206 groups. The effect is most obvious when employing a fixed OTU cut-off such as  
207 97%. One solution could be to combine universal metabarcoding with a  
208 dynamic cutoff method focused on noise removal than on clustering (e.g., Eren  
209 *et al.*, 2015). Such an approach may increase the phylogenetic resolution.  
210 Moreover, biases in relative taxa abundance can be introduced through DNA  
211 extraction, PCR (primer choice, amplification), library preparation and  
212 sequencing steps (Gilbert *et al.*, 2012; Singer *et al.*, 2016). As a result,  
213 quantitative estimates are likely to be semi-quantitative at best. Universal



214 metabarcoding has the same limitation but at least comes with the advantage,  
215 that it provides a balance between all organisms, since most of the DNA  
216 template will be derived from the target groups (only excluding viruses in this  
217 case). To date, it has produced conclusive results for the general trends in  
218 plankton communities (this study, see also Gies *et al.*, 2014, Parada *et al.*,  
219 2016, Needham and Fuhrman, 2016).

220

## 221 **Conclusions**

222 Using unfractionated water samples with universal DNA metabarcoding allowed  
223 us to document major changes in almost the entire size- and functional  
224 spectrum of freshwater plankton with a single water sample analysis. Changes  
225 in the relative abundance of OTUs closely matched the seasonal dynamics of  
226 phyto-, zoo-, and bacterioplankton reported for this lake based on microscopy,  
227 indicating that relative abundance data based on read counts are ecologically  
228 meaningful. The discovery of a bloom of a largely overlooked freshwater  
229 bacteria genus was remarkable, with potential implications for the whole lake  
230 ecosystem. Our results highlight the potential of simultaneously studying both  
231 microbial and macrobial communities for an improved understanding of whole  
232 ecosystem changes. Integrative and interdisciplinary analyses may help to  
233 answer broad ecological questions in freshwater systems related to the role of  
234 keystone species; ecosystem resilience and resistance; and cross-domain  
235 interactions of species. Unfractionated sampling coupled with metabarcoding  
236 using a universal primer provides a powerful approach for studying plankton  
237 dynamics in aquatic systems and shows promise for long-term whole  
238 community monitoring.

239

## 240 **Acknowledgements**

241 We thank Uta Mallock for chemical analysis, Susan Mbedi for assistance in  
242 sequencing and Marie Jeschek for assistance in data processing. Financial  
243 support was provided by the SAW/Pact for Research and Innovation of the  
244 Leibniz Association projects "Terralac", "TEMBI", and "MycoLink". R. Tischbier  
245 (Stiftung Pro Artenvielfalt) kindly provided us access to the lake. The authors  
246 declare no conflict of interest.

247

248

## 249 **References**

- 250 Barberán, A., Casamayor, E.O., Fierer, N. (2014) The microbial contribution to  
251 macroecology. *Front Microbiol* **5**: 203.
- 252 Bižić-Ionescu, M., Amann, R., Grossart, H.P. (2014) Massive regime shifts and  
253 high activity of heterotrophic bacteria in an ice-covered lake. *PloS one* **9**:  
254 e113611.
- 255 Brothers, S.M., Hilt, S., Attermeyer, K., Grossart, H.P., Kosten, S., Lischke, B.,  
256 Mehner, T., Meyer, N., Scharnweber, K., Köhler, J. (2013) A regime shift from  
257 macrophyte to phytoplankton dominance enhances carbon burial in a shallow,  
258 eutrophic lake. *Ecosphere* **4**: 137.
- 259 Crump, B.C., Peterson, B.J., Raymond, P., Amon, R.M., Rinehart, A., McClelland,  
260 J.W., Holmes, R.M. (2009) Circumpolar synchrony in big river bacterioplankton.  
261 *Proc Natl Acad Sci* **106**: 21208-21212.
- 262 Engelbrektson, A., Kunin, V., Wrighton, K.C., Zvenigorodsky, N., Chen, F.,  
263 Ochman, H., Hugenholtz, P. (2010) Experimental factors affecting PCR-based  
264 estimates of microbial species richness and evenness. *ISME J* **4**: 642-647.
- 265 Eren, A.M., Morrison, H.G., Lescault, P.J., Reveillaud, J., Vineis, J.H., Sogin, M.L.  
266 (2015) Minimum entropy decomposition: unsupervised oligotyping for sensitive  
267 partitioning of high-throughput marker gene sequences. *ISME J* **9**: 968-979.
- 268 Fuhrman, J.A., Cram, J.A., Needham, D.M. (2015) Marine microbial community  
269 dynamics and their ecological interpretation. *Nat Rev Microbiol* **13**: 133-146.
- 270 Gies, E.A., Konwar, K.M., Beatty, J.T., Hallam, S.J. (2014) Illuminating microbial  
271 dark matter in meromictic Sakinaw Lake. *Appl Environ Microbiol* **80**: 6807-  
272 6818.
- 273 Gilbert, J.A., Steele, J.A., Caporaso, J.G., Steinbrück, L., Reeder, J., Temperton, B.  
274 *et al.* (2012) Defining seasonal marine microbial community dynamics. *ISME J*

- 275 **6**: 298–308.
- 276 Hilt, S., Wanke, T., Scharnweber, K., Brauns, M., Syväranta, J., Brothers, S., *et al.*  
277 (2015) Contrasting response of two shallow eutrophic cold temperate lakes to a  
278 partial winterkill of fish. *Hydrobiologia* **749**: 31-42.
- 279 Hölker, F., Wurzbacher, C., Weißenborn, C., Monaghan, M.T., Holzhauser, S.I.,  
280 Premke, K. (2015) Microbial diversity and community respiration in freshwater  
281 sediments influenced by artificial light at night. *Philos T Roy Soc B* **370**:  
282 20140130.
- 283 Lima-Mendez, G., Faust, K., Henry, N., Decelle, J., Colin, S., Carcillo, F. *et al.*  
284 (2015) Determinants of community structure in the global plankton  
285 interactome. *Science* **348**: 1262073.
- 286 Lischke, B., Weithoff, G., Wickham, S.A., Attermeyer, K., Grossart, H.P.,  
287 Scharnweber, K. *et al.* (2016) Large biomass of small feeders: ciliates may  
288 dominate herbivory in eutrophic lakes. *J Plankton Res* **38**: 2–15.
- 289 Needham, D.M., Fuhrman, J.A. (2016) Pronounced daily succession of  
290 phytoplankton, archaea and bacteria following a spring bloom. *Nat Microbiol* **1**:  
291 16005.
- 292 Parada, A.E., Needham, D.M., Fuhrman, J.A. (2016) Every base matters:  
293 assessing small subunit rRNA primers for marine microbiomes with mock  
294 communities, time series and global field samples. *Environ Microbiol* **18**: 1403-  
295 1414.
- 296 Pernthaler, J., Glöckner, F. O., Unterholzner, S., Alfreider, A., Psenner, R.,  
297 Amann, R. (1998) Seasonal community and population dynamics of pelagic  
298 bacteria and archaea in a high mountain lake. *Appl Environ Microbiol* **64**: 4299-  
299 4306.
- 300 Peter, H., Sommaruga, R. (2016) Shifts in diversity and function of lake  
301 bacterial communities upon glacier retreat. *ISME J* **10**: 1545–1554.
- 302 Pruesse, E., Peplies, J., Glöckner, F.O. (2012) SINA: accurate high-throughput  
303 multiple sequence alignment of ribosomal RNA genes. *Bioinformatics* **28**: 1823-  
304 1829.
- 305 Savio, D., Sinclair, L., Ijaz, U.Z., Parajka, J., Reischer, G.H., Stadler, P., *et al.*  
306 (2015) Bacterial diversity along a 2600 km river continuum. *Environ Microbiol*  
307 **17**: 4994-5007.
- 308 Schloss, P.D., Westcott, S.L., Ryabin, T., Hall, J.R., Hartmann, M., Hollister, E.B.,  
309 *et al.* (2009) Introducing mothur: open-source, platform-independent,

310 community-supported software for describing and comparing microbial  
311 communities. *Appl Environ Microbiol* **75**: 7537-7541.

312 Shade, A., Caporaso, J.G., Handelsman, J., Knight, R., Fierer, N. (2013) A meta-  
313 analysis of changes in bacterial and archaeal communities with time. *ISME J* **7**:  
314 1493-1506.

315 Shade, A., Jones, S.E., Caporaso, J.G., Handelsman, J., Knight, R., Fierer, N.,  
316 Gilbert, J.A. (2014) Conditionally rare taxa disproportionately contribute to  
317 temporal changes in microbial diversity. *MBio* **5**: e01371-14.

318 Singer, E., Bushnell, B., Coleman-Derr, D., Bowman, B., Bowers, R.M., Levy, A.,  
319 *et al.* (2016) High-resolution phylogenetic microbial community profiling. *ISME J*  
320 **10**: 2020-2032.

321 Steele, J.A., Countway, P.D., Xia, L., Vigil, P.D., Beman, J.M., Kim, D.Y., *et al.*  
322 (2011) Marine bacterial, archaeal and protistan association networks reveal  
323 ecological linkages. *ISME J* **5**: 1414-1425.

324 Tang, C.Q., Leasi, F., Obertegger, U., Kieneke, A., Barraclough, T.G., Fontaneto,  
325 D. (2012) The widely used small subunit 18S rDNA molecule greatly  
326 underestimates true diversity in biodiversity surveys of the meiofauna. *PNAS*  
327 **109**: 16208-16212.

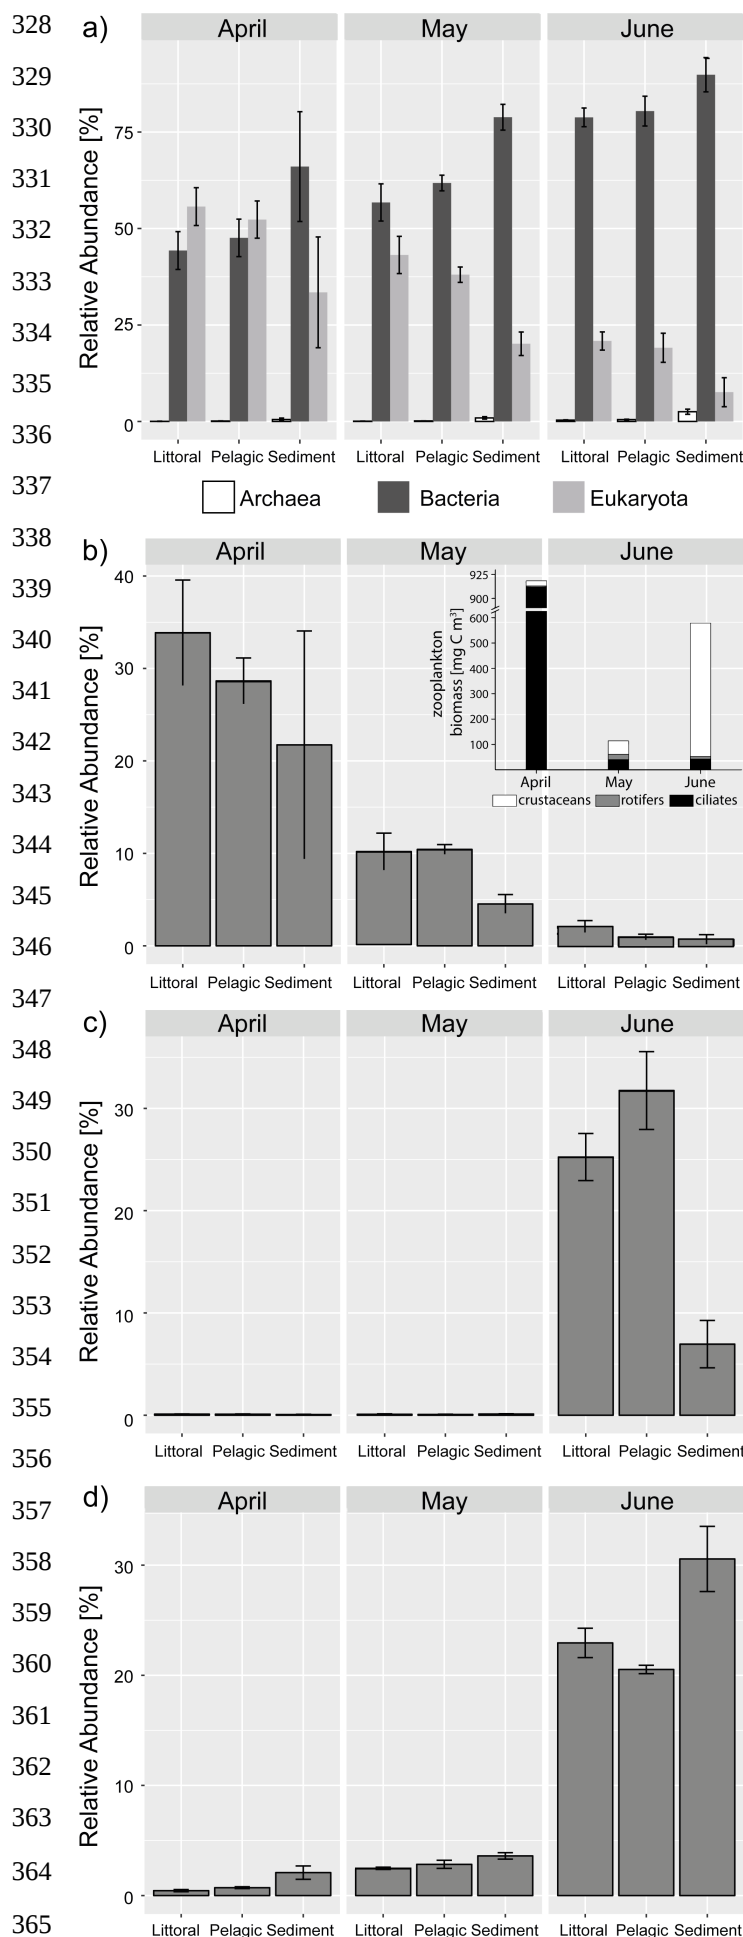

366 **Figure 2.** Seasonal appearance of (a) *Arcicella* exhibited pronounced maxima and  
367 minima over the course of the 2 years and appeared in the particle-attached ( $> 5 \mu\text{m}$ )  
368 and free-living fraction ( $0.2 - 5 \mu\text{m}$ ). *Arcicella* was detected using a PCR assay (see  
369 experimental procedures S1) and evaluated based on gel electrophoresis band  
370 intensity where 0 = no PCR product, 1 = very weak product, 2 = weak product, 3 =  
371 medium product, 4 = strong product. For this data we applied rank based correlation  
372 tests based on local similarities for time-series analysis (see Table S3 in SI1).  
373 Correlations that were significant correlated with the band intensity of *Arcicella*  
374 products derived from both size fractions were Chlorophyll a and crustacean biomass,  
375 both of which were plotted in panel (b).

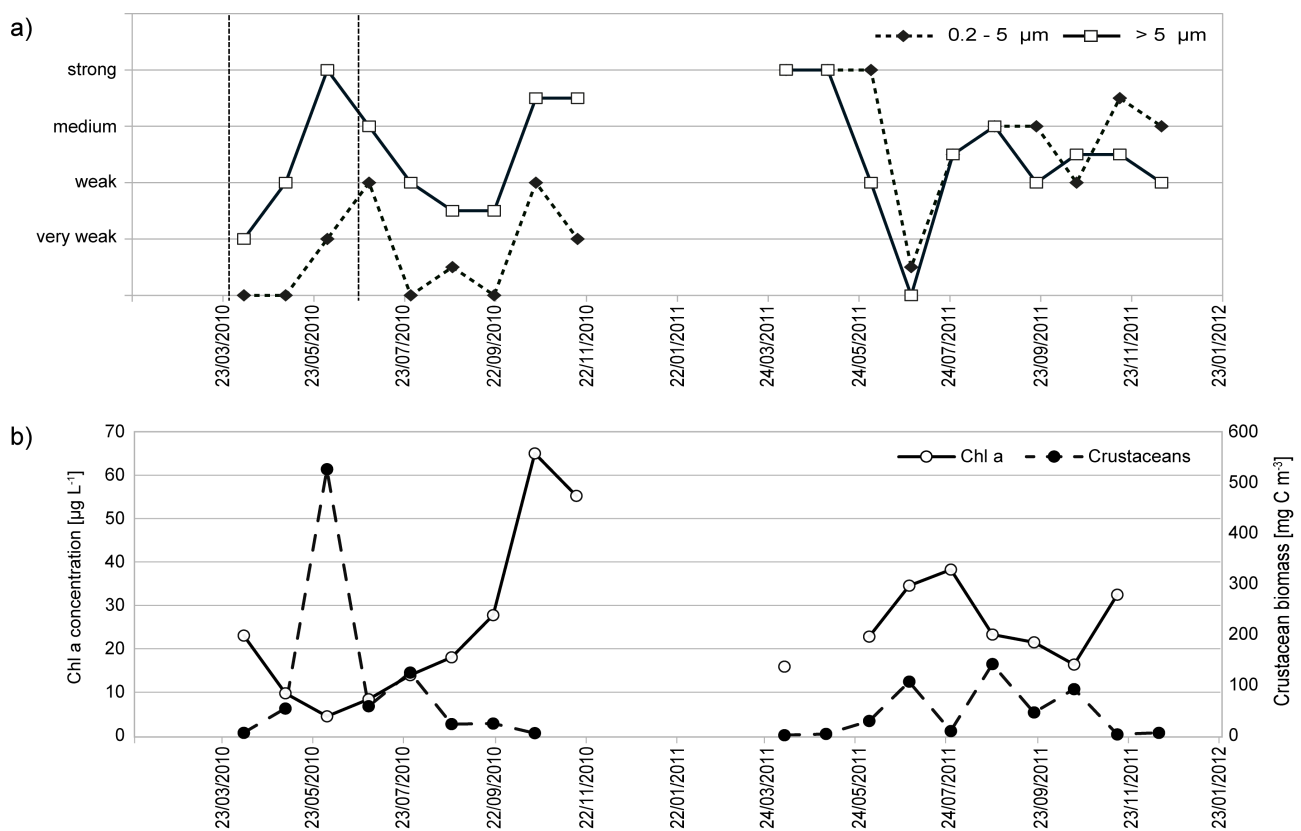

Source: https://www.biorxiv.org/content/10.1101/058628v3.full.pdf
